# Supplementary material for: Evaluation of upper extremity neurorehabilitation using technology: a European Delphi consensus study within the EU COST Action Network on Robotics for Neurorehabilitation
Source: J Neuroeng Rehabil. 2016 Sep 23;13:86. doi: 10.1186/s12984-016-0192-z (PMC5035444; doi:10.1186/s12984-016-0192-z)
Supplement: Additional file 1: — Data from Delphi rounds. (XLSX 246 kb) [file 12984_2016_192_MOESM1_ESM.xlsx]

## Sheet: Questions-Brussels 1 (07.11.12)
Meeting: Brussels 1
Date: 07.11.2012
Question 2.: Would the publication of guidelines recommending an assessment framework and specific outcome measures for use in robot therapy and other technology-based neuro-rehabilitation be useful?
Answer 1: Yes
Answer 2: No
Answer 3: Unsure
Answer 4: No reply
Question 3.: What is our aim in generating the publishing the guidelines? And how are they to be used? Are they aimed at clinicians and researchers who would select a subset that they think most appropriate or are we suggesting they should use ALL of them with all patients?
Answer 1: Users (Clinicians and Researchers) will be expected to select SOME measures
Answer 2: Users (Clinicians and Researchers) will be expected to use ALL measures
Answer 3: This question requires discussion/expansion. For example, we might include some measures that should always be done as a minimum; we might also want to have a set of guidelines for clinicians and a different one for researchers
Answer 4: No reply
Question 4.: What is the purpose of measurement?
Answer 1: To determine therapy (initial decisions and changes in therapy programme)
Answer 2: To measure progress
Answer 3: Both 1 and 2
Answer 4: Neither 1 or 2
Answer 5: No reply
Question 5.: Should recommendations be based on the ICF Framework and include measures in each category?
Answer 1: Yes
Answer 2: No
Answer 3: Unsure
Answer 4: No reply
Question 6.: Should we give preference to measures that span more than one ICF category?
Answer 1: Yes
Answer 2: No
Answer 3: Unsure
Answer 4: No reply
Question 7.: Is robot generated data useful for clinicians and/or researchers?
Answer 1: Clinicians only
Answer 2: Researchers only
Answer 3: Both
Answer 4: Neither
Answer 5: Unsure
Answer 6: No reply
Question 8: If robot generated data is useful what category of parameters do clinicians and/or researchers need? You can only vote for FOUR options, so if you think that numbers 1, 3, 4 and 6 are the most important, press 1, 3, 4, 6 on your handset.
Answer 1: Strength										QUESTION ASKED AND ANSWERED 2 TIMES
Answer 2: Active ROM
Answer 3: Passive ROM
Answer 4: Accuracy/Quality
Answer 5: Smoothness of movement
Answer 6: Speed of movement
Answer 7: Peak acceleration of movement
Answer 8: Repeatability/Endurance
Answer 9: No reply
Question 9: Thinking about Impairment Measures (body structures and function), which categories are useful? You can only vote for three options, so if you think that numbers 1, 3, and 6 are the most important, press 1, 3, 6 on your handset.
Answer 1: Attention										QUESTION ASKED AND ANSWERED 2 TIMES
Answer 2: Automaticity/Cognitive load
Answer 3: Effort
Answer 4: Dexterity/Manipulation
Answer 5: Co-ordination
Answer 6: Other (for discussion)
Answer 7: No reply
Question 10.: Are EMG measures useful?
Answer 1: Yes
Answer 2: No
Answer 3: Unsure
Answer 4: No reply
Question 11.: If EMG is used what information/variables would be useful?
Answer 1: A measure of stretch response (spasticity)
Answer 2: Measures of abnormal co-activation or muscle synergy
Answer 3: Measures of muscle onset time
Answer 4: Other (for discussion)
Answer 5: No reply
Question 12.: Are cortical or eye movement measures useful?
Answer 1: Yes
Answer 2: No
Answer 3: Unsure
Answer 4: No reply
Question 13.: If cortical or eye movement measures are used what information/variables would be useful? You can only vote for THREE options, so if you think that numbers 1, 3, and 5 are the most important, press 1, 3, 5 on your handset.
Answer 1: Attention
Answer 2: ERPs (e.g. de-synchronization/synchronization)
Answer 3: Eye movements (e.g. saccades)
Answer 4: TMS evoked EMG responses
Answer 5: Neuro-imaging (e.g. fMRI)
Answer 6: No reply
Question 14.: Thinking about Measures of Activity, should measures be restricted to validated outcome measures such as the ARAT or WMFT?
Answer 1: Yes
Answer 2: No
Answer 3: Unsure
Answer 4: No reply
Question 15.: Thinking about Measures of Activity, if we consider additional measures of activity which categories would be useful? You can only vote for TWO options, so if you think that numbers 1 and 3 are the most important, press 1 and 3 on your handset.
Answer 1: None
Answer 2: Measures that can be used at home
Answer 3: Body-worn sensors to generate activity
Answer 4: Body-worn sensors as surrogate measures of current tools, such as the WMFT
Answer 5: Other
Answer 6: No reply
Question 16.: Thinking about Participation Measures, what measures would be useful? You can only vote for TWO options, so if you think that numbers 1 and 3 are the most important, press 1 and 3 on your handset.
Answer 1: None
Answer 2: Standardized/Validated PROMs only (e.g. SIS, SF36, PIADS)
Answer 3: Technology-based measures
Answer 4: Purpose-designed Questionnaires
Answer 5: No reply

## Sheet: Data-Brussels 1 (07.11.12)
COUNT
	Q2.1	Q2.2	Q2.3	Q2.4	Total Q2	Q3.1	Q3.2	Q3.3	Q3.4	Total Q3	Q4.1	Q4.2	Q4.3	Q4.4	Q4.5	Total Q4	Q5.1	Q5.2	Q5.3	Q5.4	Total Q5	Q6.1	Q6.2	Q6.3	Q6.4	Total Q6	Q7.1	Q7.2	Q7.3	Q7.4	Q7.5	Q7.6	Total Q7	Q8R1.1	Q8R1.2	Q8R1.3	Q8R1.4	Q8R1.5	Q8R1.6	Q8R1.7	Q8R1.8	Q8R1.9	Total Q8R1	Q8R2.1	Q8R2.2	Q8R2.3	Q8R2.4	Q8R2.5	Q8R2.6
Practicing Clinicians (Therapist, Doctor, etc.) Total present: 1	1	0	0	0	1	0	0	1	0	1	0	0	1	0	0	1	0	0	1	0	1	1	0	0	0	1	0	0	1	0	0	0	1	1	1	0	1	0	0	0	1	-3	4	0	0	0	1	0	1
Non-Clinicians and Non-practicing Clinicians Total present: 7	7	0	0	0	7	1	0	6	0	7	0	3	4	0	0	7	5	0	2	0	7	1	4	2	0	7	0	0	6	1	0	0	7	5	5	2	3	3	2	0	5	-18	25	0	0	2	6	3	3
TOTAL REPLIES PER ANSWER Total present: 8	8	0	0	0	8	1	0	7	0	8	0	3	5	0	0	8	5	0	3	0	8	2	4	2	0	8	0	0	7	1	0	0	8	6	6	2	4	3	2	0	6	-21	29	0	0	2	7	3	4
PERCENTAGES BY ANSWER WITHIN GROUP
	Q2.1	Q2.2	Q2.3	Q2.4	Total Q2	Q3.1	Q3.2	Q3.3	Q3.4	Total Q3	Q4.1	Q4.2	Q4.3	Q4.4	Q4.5	Total Q4	Q5.1	Q5.2	Q5.3	Q5.4	Total Q5	Q6.1	Q6.2	Q6.3	Q6.4	Total Q6	Q7.1	Q7.2	Q7.3	Q7.4	Q7.5	Q7.6	Total Q7	Q8R1.1	Q8R1.2	Q8R1.3	Q8R1.4	Q8R1.5	Q8R1.6	Q8R1.7	Q8R1.8	Q8R1.9	Total Q8R1	Q8R2.1	Q8R2.2	Q8R2.3	Q8R2.4	Q8R2.5	Q8R2.6
Practicing Clinicians (Therapist, Doctor, etc.) Total present: 1	100	0	0	0	100	0	0	100	0	100	0	0	100	0	0	100	0	0	100	0	100	100	0	0	0	100	0	0	100	0	0	0	100	25	25	0	25	0	0	0	25	-75	100	0	0	0	50	0	50
Non-Clinicians and Non-practicing Clinicians Total present: 7	100	0	0	0	100	14.2857	0	85.7143	0	100	0	42.8571	57.1429	0	0	100	71.4286	0	28.5714	0	100	14.2857	57.1429	28.5714	0	100	0	0	85.7143	14.2857	0	0	100	20	20	8	12	12	8	0	20	-72	100	0	0	14.2857	42.8571	21.4286	21.4286
TOTAL REPLIES PER ANSWER Total present: 8	100	0	0	0	100	12.5	0	87.5	0	100	0	37.5	62.5	0	0	100	62.5	0	37.5	0	100	25	50	25	0	100	0	0	87.5	12.5	0	0	100	20.6897	20.6897	6.89655	13.7931	10.3448	6.89655	0	20.6897	-72.4138	100	0	0	12.5	43.75	18.75	25
PERCENTAGES BY GROUP WITHIN ANSWER
	Q2.1	Q2.2	Q2.3	Q2.4	Total Q2	Q3.1	Q3.2	Q3.3	Q3.4	Total Q3	Q4.1	Q4.2	Q4.3	Q4.4	Q4.5	Total Q4	Q5.1	Q5.2	Q5.3	Q5.4	Total Q5	Q6.1	Q6.2	Q6.3	Q6.4	Total Q6	Q7.1	Q7.2	Q7.3	Q7.4	Q7.5	Q7.6	Total Q7	Q8R1.1	Q8R1.2	Q8R1.3	Q8R1.4	Q8R1.5	Q8R1.6	Q8R1.7	Q8R1.8	Q8R1.9	Total Q8R1	Q8R2.1	Q8R2.2	Q8R2.3	Q8R2.4	Q8R2.5	Q8R2.6
Practicing Clinician (Therapist, Doctor, etc.) Total present: 1	12.5	0	0	0	12.5	0	0	14.2857	0	12.5	0	0	20	0	0	12.5	0	0	33.3333	0	12.5	50	0	0	0	12.5	0	0	14.2857	0	0	0	12.5	16.6667	16.6667	0	25	0	0	0	16.6667	14.2857	13.7931	0	0	0	14.2857	0	25
Non-Clinicians and Non-practicing Clinicians Total present: 7	87.5	0	0	0	87.5	100	0	85.7143	0	87.5	0	100	80	0	0	87.5	100	0	66.6667	0	87.5	50	100	100	0	87.5	0	0	85.7143	100	0	0	87.5	83.3333	83.3333	100	75	100	100	0	83.3333	85.7143	86.2069	0	0	100	85.7143	100	75
TOTAL REPLIES PER ANSWER Total present: 8	100	0	0	0	100	100	0	100	0	100	0	100	100	0	0	100	100	0	100	0	100	100	100	100	0	100	0	0	100	100	0	0	100	100	100	100	100	100	100	0	100	100	100	0	0	100	100	100	100
[truncated: 61 more columns]

## Sheet: Questions-Brussels 2 (08.11.12)
Meeting: Brussels 2
Date: 08.11.2012
Question 1.: How familiar are you with robots/technology in rehabilitation? Choose one option.
Answer 1: Not very or not at all familiar
Answer 2: Moderately familiar
Answer 3: Very familiar
Answer 4: No reply
Question 2.: Would publication of recommendations on an assessment framework and specific outcome measures for use in robot therapy and other technology-based neuro-rehabilitation be useful? Choose one option on your handset.
Answer 1: Yes
Answer 2: No
Answer 3: Unsure
Answer 4: No reply
Question 3.1: How should the guidelines be used by clinicians? Choose one option.
Answer 1: Users will be expected to select SOME measures
Answer 2: Users will be expected to use ALL measures
Answer 3: Minimum mandatory measures
Answer 4: 1 and 3
Answer 5: No reply
Question 3.2: How should the guidelines be used by researchers? Choose one option.
Answer 1: Users will be expected to select SOME measures
Answer 2: Users will be expected to use ALL measures
Answer 3: Minimum mandatory measures
Answer 4: 1 and 3
Answer 5: No reply
Question 4.: What is the purpose of measurement? Choose one option.
Answer 1: To design therapy (initial decisions and changes in therapy programme)
Answer 2: To measure progress
Answer 3: Both 1 and 2
Answer 4: Neither 1 or 2
Answer 5: No reply
Question 5.: Should recommendations (including technology based and clinical measures) comply with each and all categories of the ICF Framework? Choose one option.
Answer 1: Yes
Answer 2: No
Answer 3: Unsure
Answer 4: No reply
Question 6.: Should we give preference to measures that span more than one ICF category? Choose one option.
Answer 1: Yes
Answer 2: No
Answer 3: Unsure
Answer 4: No reply
Question 7.: Is robot generated data useful for clinicians and/or researchers? Choose one option.
Answer 1: Clinicians only
Answer 2: Researchers only
Answer 3: Both
Answer 4: Neither
Answer 5: Unsure
Answer 6: No reply
Question 8 (Round 1): What robot generated measures should be recommended? You can only vote for FOUR options, so if you think that numbers 1, 3, 4 and 6 are the most important, press 1, 3, 4, 6 on your handset.
Answer 1: Strength
Answer 2: Active ROM
Answer 3: Passive ROM
Answer 4: Accuracy/Quality
Answer 5: Smoothness of movement
Answer 6: Speed of movement
Answer 7: Peak acceleration of movement
Answer 8: Repeatability/Endurance
Answer 9: No reply
Question 8 (Round 2): What robot generated measures should be recommended? You can only vote for TWO options out of the FOUR given to you.
Answer 1: Strength
Answer 2: Active ROM
Answer 3: Passive ROM
Answer 4: Accuracy/Quality
Answer 5: Smoothness of movement
Answer 6: Speed of movement
Answer 7: Peak acceleration of movement
Answer 8: Repeatability/Endurance
Answer 9: No reply
Question 9 (Round 1): Thinking about Impairment Measures (body structures and function) which categories are useful? You can only vote for THREE options, so if you think that numbers 1, 3, and 6 are the most important, press 1, 3, 6 on your handset.
Answer 1: Attention
Answer 2: Automaticity/Cognitive load
Answer 3: Effort
Answer 4: Dexterity/Manipulation
Answer 5: Co-ordination
Answer 6: Other (for discussion)
Answer 7: No reply
Question 9 (Round 2): Thinking about Impairment Measures (body structures and function), which categories are useful? You can only vote for TWO options, out of the THREE given to you.
Answer 1: Attention
Answer 2: Automaticity/Cognitive load
Answer 3: Effort
Answer 4: Dexterity/Manipulation
Answer 5: Co-ordination
Answer 6: Other (for discussion)
Answer 7: No reply
Question 10.: Are EMG measures useful? Choose one option.
Answer 1: Yes
Answer 2: No
Answer 3: Unsure
Answer 4: No reply
Question 11.: If EMG is used what information/variables would be useful? Choose any number of options on your handset.
Answer 1: A measure of stretch response (spasticity)
Answer 2: Measures of abnormal co-activation or muscle synergy
Answer 3: Measures of muscle onset time
Answer 4: Other (for discussion)
Answer 5: No reply
Question 12.: Are cortical or eye movement measures useful? Choose one option.
Answer 1: Yes
Answer 2: No
Answer 3: Unsure
Answer 4: No reply
Question 13.: If cortical or eye movement measures are used what information/variables would be useful? You can only vote for THREE options, so if you think that numbers 1, 3, and 5 are the most important, press 1, 3, 5 on your handset.
Answer 1: Attention
Answer 2: ERPs (e.g., de-synchronization/synchronization)
Answer 3: Eye movements (e.g., Saccades)
Answer 4: TMS evoked EMG responses
Answer 5: Neuro-imaging (e.g., fMRI)
Answer 6: No reply
Question 14.: Thinking about Measures of Activity: Should measures be restricted to validated outcome measures such as the ARAT or WMFT? Choose one option on your handset.
Answer 1: Yes
Answer 2: No
Answer 3: Unsure
Answer 4: No reply
Question 15.: Thinking about Measures of Activity: If we consider additional measures of activity which categories would be useful? You can choose none (press 1) or vote for any number of other options.
Answer 1: None
Answer 2: Measures that can be used at home
Answer 3: Body-worn sensors to generate activity
Answer 4: Body-worn sensors as surrogate measures of current tools, such as the WMFT
Answer 5: Other
Answer 6: No reply
Question 16.: Thinking about Participation Measures: What measures would be useful? You can choose none (press 1) or vote for any number of other options.
Answer 1: None
Answer 2: Standardized/Validated PROMs only (e.g., SIS, SF36, PIADS)
Answer 3: Technology-based measures
Answer 4: Purpose-designed Questionnaires
Answer 5: No reply

## Sheet: Data-Brussels 2 (08.11.12)
COUNT
	Q1.1	Q1.2	Q1.3	Q1.4	Total Q1	Q2.1	Q2.2	Q2.3	Q2.4	Total Q2	Q3.1.1	Q3.1.2	Q3.1.3	Q3.1.4	Q3.1.5	Total Q3.1	Q3.2.1	Q3.2.2	Q3.2.3	Q3.2.4	Q3.2.5	Total Q3.2	Q4.1	Q4.2	Q4.3	Q4.4	Q4.5	Total Q4	Q5.1	Q5.2	Q5.3	Q5.4	Total Q5	Q6.1	Q6.2	Q6.3	Q6.4	Total Q6	Q7.1	Q7.2	Q7.3	Q7.4	Q7.5	Q7.6	Total Q7	Q8R1.1	Q8R1.2	Q8R1.3	Q8R1.4
Practicing Clinicians (Therapist, Doctor, etc.) Total present: 3	0	2	1	0	3	2	0	1	0	3	0	0	1	2	0	3	0	0	0	3	0	3	0	0	3	0	0	3	2	0	1	0	3	2	0	1	0	3	0	0	3	0	0	0	3	2	3	0	2
Non-Clinicians and Non-practicing Clinicians Total present: 9	0	0	9	0	9	9	0	0	0	9	3	0	1	5	0	9	2	0	2	5	0	9	0	1	8	0	0	9	8	0	1	0	9	2	4	3	0	9	0	0	9	0	0	0	9	6	9	1	6
TOTAL REPLIES PER ANSWER Total present: 12	0	2	10	0	12	11	0	1	0	12	3	0	2	7	0	12	2	0	2	8	0	12	0	1	11	0	0	12	10	0	2	0	12	4	4	4	0	12	0	0	12	0	0	0	12	8	12	1	8
PERCENTAGES BY ANSWER WITHIN GROUP
	Q1.1	Q1.2	Q1.3	Q1.4	Total Q1	Q2.1	Q2.2	Q2.3	Q2.4	Total Q2	Q3.1.1	Q3.1.2	Q3.1.3	Q3.1.4	Q3.1.5	Total Q3.1	Q3.2.1	Q3.2.2	Q3.2.3	Q3.2.4	Q3.2.5	Total Q3.2	Q4.1	Q4.2	Q4.3	Q4.4	Q4.5	Total Q4	Q5.1	Q5.2	Q5.3	Q5.4	Total Q5	Q6.1	Q6.2	Q6.3	Q6.4	Total Q6	Q7.1	Q7.2	Q7.3	Q7.4	Q7.5	Q7.6	Total Q7	Q8R1.1	Q8R1.2	Q8R1.3	Q8R1.4
Practicing Clinicians (Therapist, Doctor, etc.) Total present: 3	0	66.6667	33.3333	0	100	66.6667	0	33.3333	0	100	0	0	33.3333	66.6667	0	100	0	0	0	100	0	100	0	0	100	0	0	100	66.6667	0	33.3333	0	100	66.6667	0	33.3333	0	100	0	0	100	0	0	0	100	20	30	0	20
Non-Clinicians and Non-practicing Clinicians Total present: 9	0	0	100	0	100	100	0	0	0	100	33.3333	0	11.1111	55.5556	0	100	22.2222	0	22.2222	55.5556	0	100	0	11.1111	88.8889	0	0	100	88.8889	0	11.1111	0	100	22.2222	44.4444	33.3333	0	100	0	0	100	0	0	0	100	18.1818	27.2727	3.0303	18.1818
TOTAL REPLIES PER ANSWER Total present: 12	0	16.6667	83.3333	0	100	91.6667	0	8.33333	0	100	25	0	16.6667	58.3333	0	100	16.6667	0	16.6667	66.6667	0	100	0	8.33333	91.6667	0	0	100	83.3333	0	16.6667	0	100	33.3333	33.3333	33.3333	0	100	0	0	100	0	0	0	100	18.6047	27.907	2.32558	18.6047
PERCENTAGES BY GROUP WITHIN ANSWER
	Q1.1	Q1.2	Q1.3	Q1.4	Total Q1	Q2.1	Q2.2	Q2.3	Q2.4	Total Q2	Q3.1.1	Q3.1.2	Q3.1.3	Q3.1.4	Q3.1.5	Total Q3.1	Q3.2.1	Q3.2.2	Q3.2.3	Q3.2.4	Q3.2.5	Total Q3.2	Q4.1	Q4.2	Q4.3	Q4.4	Q4.5	Total Q4	Q5.1	Q5.2	Q5.3	Q5.4	Total Q5	Q6.1	Q6.2	Q6.3	Q6.4	Total Q6	Q7.1	Q7.2	Q7.3	Q7.4	Q7.5	Q7.6	Total Q7	Q8R1.1	Q8R1.2	Q8R1.3	Q8R1.4
Practicing Clinician (Therapist, Doctor, etc.) Total present: 3	0	100	10	0	25	18.1818	0	100	0	25	0	0	50	28.5714	0	25	0	0	0	37.5	0	25	0	0	27.2727	0	0	25	20	0	50	0	25	50	0	25	0	25	0	0	25	0	0	0	25	25	25	0	25
Non-Clinicians and Non-practicing Clinicians Total present: 9	0	0	90	0	75	81.8182	0	0	0	75	100	0	50	71.4286	0	75	100	0	100	62.5	0	75	0	100	72.7273	0	0	75	80	0	50	0	75	50	100	75	0	75	0	0	75	0	0	0	75	75	75	100	75
TOTAL REPLIES PER ANSWER Total present: 12	0	100	100	0	100	100	0	100	0	100	100	0	100	100	0	100	100	0	100	100	0	100	0	100	100	0	0	100	100	0	100	0	100	100	100	100	0	100	0	0	100	0	0	0	100	100	100	100	100
[truncated: 73 more columns]

## Sheet: Questions-Madrid (13.11.12)
Meeting: Madrid
Date: 13.11.2012
Question 3.: How experienced are you with robot therapy and other technology based neuro-rehabilitation? Choose one option.
Answer 1: Not very or not at all experienced
Answer 2: Moderately experienced
Answer 3: Very experienced
Answer 4: No reply
Question 4.: Would publication of recommendations on an assessment framework and outcome measures for use in robot therapy and other technology based neuro-rehabilitation be useful? Choose one option.
Answer 1: Yes
Answer 2: No
Answer 3: Unsure
Answer 4: No reply
Question 5.: How should the recommendations be used by clinicians? Choose one option.
Answer 1: Users will be expected to select SOME measures
Answer 2: Users will be expected to use ALL measures
Answer 3: Minimum mandatory measures
Answer 4: 1 and 3
Answer 5: No reply
Question 6.: How should the recommendations be used by researchers? Choose one option.
Answer 1: Users will be expected to select SOME measures
Answer 2: Users will be expected to use ALL measures
Answer 3: Minimum mandatory measures
Answer 4: 1 and 3
Answer 5: No reply
Question 7.: What is the purpose of measurement? Choose one option.
Answer 1: To design therapy (initial decisions and changes in therapy programme)
Answer 2: To measure progress
Answer 3: Both 1 and 2
Answer 4: Neither 1 or 2
Answer 5: No reply
Question 8.: Should recommendations (including technology based and clinical measures) fall within the ICF Framework? Choose one option.
Answer 1: Yes
Answer 2: No
Answer 3: Unsure
Answer 4: No reply
Question 9.: Is technology generated data useful for clinicians and/or researchers? Choose one option.
Answer 1: Clinicians only
Answer 2: Researchers only
Answer 3: Both
Answer 4: Neither
Answer 5: Unsure
Answer 6: No reply
Question 10 - Researchers: Which categories are most important? Choose any number of options.
Answer 1: Kinematic
Answer 2: Kinetic
Answer 3: Movement quality
Answer 4: Effort
Answer 5: Psychomotoric
Answer 6: No reply
Question 11 - Researchers: Which, if any, of the following kinematic measures should be recommended? Choose none (Press 1) or any number of other options.
Answer 1: None
Answer 2: Active ROM
Answer 3: Extent of workspace
Answer 4: Speed of movement
Answer 5: Other measures not included above
Answer 6: No reply
Question 12a - Researchers (Round 1): Which, if any, of the following kinetic measures, should be recommended? You can choose none (Press 1) or vote for FOUR options, so if you think that numbers 2, 3, 6 and 7 are the most important, press 2, 3, 6 and 7.
Answer 1: None
Answer 2: Isometric force in a range of muscles and positions
Answer 3: Isokinetic force in a range of muscles and movements
Answer 4: Grip strength
Answer 5: Endurance
Answer 6: Muscle stiffness (resistance to passive movement)
Answer 7: Spasticity
Answer 8: No reply
Question 12b - Researchers (Round 2): Which, if any, of the following kinetic measures should be recommended? You can only vote for TWO out of the FOUR options given to you.
Answer 1: None
Answer 2: Isometric force in a range of muscles and positions
Answer 3: Isokinetic force in a range of muscles and movements
Answer 4: Grip strength
Answer 5: Endurance
Answer 6: Muscle stiffness (resistance to passive movement)
Answer 7: Spasticity
Answer 8: No reply
Question 13a - Researchers (Round 1): Which, if any, of the following quality of movement measures should be recommended? You can choose none (Press 1) or vote for FOUR options, so if you think that numbers 2, 3, 6 and 7 are the most important, press 2, 3, 6 and 7.
Answer 1: None
Answer 2: Co-ordination
Answer 3: Smoothness of movement
Answer 4: Precision/Accuracy of movement
Answer 5: Response to perturbations (disturbances during movement)
Answer 6: Number of errors and successes (during the performance of a task)
Answer 7: Compensatory (abnormal) movements
Answer 8: No reply
Question 13b - Researchers (Round 2): Which, if any, of the following quality of movement measures should be recommended? You can only vote for TWO out of the FOUR options given to you.
Answer 1: None
Answer 2: Co-ordination
Answer 3: Smoothness of movement
Answer 4: Precision/Accuracy of movement
Answer 5: Response to perturbations (disturbances during movement)
Answer 6: Number of errors and successes (during the performance of a task)
Answer 7: Compensatory (abnormal) movements
Answer 8: No reply
Question 14a - Researchers (Round 1): Which, if any, of the following muscle activity measures should be recommended? You can choose none (Press 1) or vote for THREE options, so if you think that numbers 3, 4 and 5 are the most important, press 3, 4 and 5.
Answer 1: None
Answer 2: Co-contraction
Answer 3: Synergies
Answer 4: Muscle onset time
Answer 5: Inappropriate muscle activity
Answer 6: No reply
Question 14 b - Researchers (Round 2): Which, if any, of the following muscle activity measures should be recommended? You can choose none (Press 1) or vote for the THREE options given to you.
Answer 1: None
Answer 2: Co-contraction
Answer 3: Synergies
Answer 4: Muscle onset time
Answer 5: Inappropriate muscle activity
Answer 6: No reply
Question 15.: Which, if any, of the following effort during movement measures should be recommended? You can choose none (Press 1) or any number of other options.
Answer 1: None
Answer 2: Work done, energy consumed (measured in calories)
Answer 3: O2 consumption
Answer 4: Amount of assistance required to complete task
Answer 5: No reply
Question 16.: Which, if any, of the following psychomotric measures should be recommended? You can choose none (Press 1) or any number of other options.
Answer 1: None
Answer 2: Attention +/- when distracted
Answer 3: Neglect
Answer 4: Engagement
Answer 5: Reaction time
Answer 6: Pain associated with movement
Answer 7: No reply
Question 17 - Researchers: Thinking about non-technology based measures of Activity: Should measures be restricted to validated outcome measures such as the ARAT or WMFT ? Choose one option.
Answer 1: Yes
Answer 2: No
Answer 3: Unsure
Answer 4: No reply
Question 18 - Researchers: Which categories of technology based measures of Activity should be included in the recommendations? You can choose none (press 1) or vote for any number of other options.
Answer 1: None
Answer 2: Measures that can be used at home
Answer 3: Body-worn sensors to monitor activity
Answer 4: Body-worn sensors as surrogate measures of validated outcome measures (e.g. the WMFT)
Answer 5: Other
Answer 6: No reply
Question 19 - Researchers: Thinking about non technology based measures of Participation: Should measures be restricted to validated outcome measures such as SIS, SF36 ? Choose one option.
Answer 1: Yes
Answer 2: No
Answer 3: Unsure
Answer 4: No reply
Question 20 - Researchers: Which categories of technology based measures of participation should be included in the recommendations? You can choose none or vote for any number of other options.
Answer 1: None
Answer 2: General self monitoring measures (quantified self), e.g. movement tracking cameras, sensorised environment, body worn sensors, GPS
Answer 3: Social participation e.g. social networking
Answer 4: Web based tools for completion of validated measures (e.g. SF36)
Answer 5: A measure that combines some or all of the above
Answer 6: No reply
Question 21 - Clinicians: Which categories are most important? Choose any number of options.
Answer 1: Kinematic
Answer 2: Kinetic
Answer 3: Movement quality
Answer 4: Effort
Answer 5: Psychomotoric
Answer 6: No reply
Question 22 - Clinicians: Which, if any, of the following kinematic measures should be recommended? Choose none (Press 1) or any number of other options.
Answer 1: None
Answer 2: Active ROM
Answer 3: Extent of workspace
Answer 4: Speed of movement
Answer 5: Other measures not included above
Answer 6: No reply
Question 23a - Clinicians (Round 1): Which, if any, of the following kinetic measures, should be recommended? You can choose none (Press 1) or vote for FOUR options, so if you think that numbers 2, 3, 6 and 7 are the most important, press 2, 3, 6 and 7.
Answer 1: None
Answer 2: Isometric force in a range of muscles and positions
Answer 3: Isokinetic force in a range of muscles and movements
Answer 4: Grip strength
Answer 5: Endurance
Answer 6: Muscle stiffness (resistance to passive movement)
Answer 7: Spasticity
Answer 8: No reply
Question 23b - Clinicians (Round 2): Which, if any, of the following kinetic measures should be recommended? You can only vote for TWO out of the FOUR options given to you.
Answer 1: None
Answer 2: Isometric force in a range of muscles and positions
Answer 3: Isokinetic force in a range of muscles and movements
Answer 4: Grip strength
Answer 5: Endurance
Answer 6: Muscle stiffness (resistance to passive movement)
Answer 7: Spasticity
Answer 8: No reply
Question 24a - Cclinicians (Round 1): Which, if any, of the following quality of movement measures should be recommended? You can choose none (Press 1) or vote for FOUR options, so if you think that numbers 2, 3, 6 and 7 are the most important, press 2, 3, 6 and 7.
Answer 1: None
Answer 2: Co-ordination
Answer 3: Smoothness of movement
Answer 4: Precision / accuracy of movement
Answer 5: Response to perturbations (disturbances during movement)
Answer 6: Number of errors and successes (during the performance of a task)
Answer 7: Compensatory (abnormal) movements
Answer 8: No reply
Question 24b - Clinicians (Round 2): Which, if any, of the following quality of movement measures should be recommended? You can only vote for TWO out of the FOUR options given to you.
Answer 1: None
Answer 2: Co-ordination
Answer 3: Smoothness of movement
Answer 4: Precision/Accuracy of movement
Answer 5: Response to perturbations (disturbances during movement)
Answer 6: Number of errors and successes (during the performance of a task)
Answer 7: Compensatory (abnormal) movements
Answer 8: No reply
Question 25a - Clinicians (Round 1): Which, if any, of the following muscle activity measures should be recommended? You can choose none (Press 1) or vote for THREE options, so if you think that numbers 3, 4 and 5 are the most important, press 3, 4 and 5.
Answer 1: None
Answer 2: Co-contraction
Answer 3: Synergies
Answer 4: Muscle onset time
Answer 5: Inappropriate muscle activity
Answer 6: No reply
Question 25b - Clinicians (Round 2): Which, if any, of the following muscle activity measures should be recommended? You can choose none (Press 1) or vote for the THREE options given to you.
Answer 1: None
Answer 2: Co-contraction							ANSWERS NOT RECORDED
Answer 3: Synergies
Answer 4: Muscle onset time
Answer 5: Inappropriate muscle activity
Answer 6: No reply
Question 26.: Which, if any, of the following effort during movement measures should be recommended? You can choose none (Press 1) or any number of other options.
Answer 1: None
Answer 2: Work done, energy consumed (measured in calories)
Answer 3: O2 consumption
Answer 4: Amount of assistance required to complete task
Answer 5: No reply
Question 27.: Which, if any, of the following psychomotric measures should be recommended? You can choose none (Press 1) or any number of other options.
Answer 1: None
Answer 2: Attention +/- when distracted
Answer 3: Neglect
Answer 4: Engagement
Answer 5: Reaction time
Answer 6: Pain associated with movement
Answer 7: No reply
Question 28 - Clinicians: Thinking about non-technology based measures of Activity: Should measures be restricted to validated outcome measures such as the ARAT or WMFT ? Choose one option.
Answer 1: Yes
Answer 2: No
Answer 3: Unsure
Answer 4: No reply
Question 29 - Clinicians: Which categories of technology based measures of Activity should be included in the recommendations? You can choose none (press 1) or vote for any number of other options.
Answer 1: None
Answer 2: Measures that can be used at home
Answer 3: Body-worn sensors to monitor activity
Answer 4: Body-worn sensors as surrogate measures of validated outcome measures (e.g. the WMFT)
Answer 5: Other
Answer 6: No reply
Question 30 - Clinicians: Thinking about non technology based measures of Participation: Should measures be restricted to validated outcome measures such as SIS, SF36 ? Choose one option.
Answer 1: Yes
Answer 2: No
Answer 3: Unsure
Answer 4: No reply
Question 31 - Clinicians: Which categories of technology based measures of participation should be included in the recommendations? You can choose none or vote for any number of other options.
Answer 1: None
Answer 2: General self monitoring measures (quantified self), e.g. movement tracking cameras, sensorised environment, body worn sensors, GPS
Answer 3: Social participation (e.g. social networking)
Answer 4: Web based tools for completion of validated measures (e.g. SF36)
Answer 5: A measure that combines some or all of the above
Answer 6: No reply

## Sheet: Data-Madrid (13.11.12)
																													0.75
COUNT																													7.75
																													8.5
	Q3.1	Q3.2	Q3.3	Q3.4	Total Q3	Q4.1	Q4.2	Q4.3	Q4.4	Total Q4	Q5.1	Q5.2	Q5.3	Q5.4	Q5.5	Total Q5	Q6.1	Q6.2	Q6.3	Q6.4	Q6.5	Total Q6	Q7.1	Q7.2	Q7.3	Q7.4	Q7.5	Total Q7	Q8.1	Q8.2	Q8.3	Q8.4	Total Q8	Q9.1	Q9.2	Q9.3	Q9.4	Q9.5	Q9.6	Total Q9	Q10R.1	Q10R.2	Q10R.3	Q10R.4	Q10R.5	Q10R.6	Total Q10R	Q11R.1	Q11R.2
Practicing Clinicians (Therapist, Doctor, etc.) Total present: 3	0	1	2	0	3	3	0	0	0	3	0	0	1	2	0	3	0	0	1	2	0	3	0	0	3	0	0	3	1	0	2	0	3	0	0	3	0	0	0	3	3	3	3	3	2	-11	14	0	3
Non-Clinicians and Non-practicing Clinicians Total present: 31	1	11	18	1	31	24	2	4	1	31	10	1	9	8	3	31	10	2	5	10	4	31	0	0	30	0	1	31	10	7	13	1	31	0	0	27	0	3	1	31	24	24	24	19	17	-77	108	1	23
TOTAL REPLIES PER ANSWER Total present: 34	1	12	20	1	34	27	2	4	1	34	10	1	10	10	3	34	10	2	6	12	4	34	0	0	33	0	1	34	11	7	15	1	34	0	0	30	0	3	1	34	27	27	27	22	19	-88	122	1	26
																													25
PERCENTAGES BY ANSWER WITHIN GROUP																													25
																													25
	Q3.1	Q3.2	Q3.3	Q3.4	Total Q3	Q4.1	Q4.2	Q4.3	Q4.4	Total Q4	Q5.1	Q5.2	Q5.3	Q5.4	Q5.5	Total Q5	Q6.1	Q6.2	Q6.3	Q6.4	Q6.5	Total Q6	Q7.1	Q7.2	Q7.3	Q7.4	Q7.5	Total Q7	Q8.1	Q8.2	Q8.3	Q8.4	Total Q8	Q9.1	Q9.2	Q9.3	Q9.4	Q9.5	Q9.6	Total Q9	Q10R.1	Q10R.2	Q10R.3	Q10R.4	Q10R.5	Q10R.6	Total Q10R	Q11R.1	Q11R.2
Practicing Clinicians (Therapist, Doctor, etc.) Total present: 3	0	33.3333	66.6667	0	100	100	0	0	0	100	0	0	33.3333	66.6667	0	100	0	0	33.3333	66.6667	0	100	0	0	100	0	0	100	33.3333	0	66.6667	0	100	0	0	100	0	0	0	100	21.4286	21.4286	21.4286	21.4286	14.2857	-78.5714	100	0	30
Non-Clinicians and Non-practicing Clinicians Total present: 31	3.22581	35.4839	58.0645	3.22581	100	77.4194	6.45161	12.9032	3.22581	100	32.2581	3.22581	29.0323	25.8065	9.67742	100	32.2581	6.45161	16.129	32.2581	12.9032	100	0	0	96.7742	0	3.22581	100	32.2581	22.5806	41.9355	3.22581	100	0	0	87.0968	0	9.67742	3.22581	100	22.2222	22.2222	22.2222	17.5926	15.7407	-71.2963	100	1.19048	27.381
TOTAL REPLIES PER ANSWER Total present: 34	2.94118	35.2941	58.8235	2.94118	100	79.4118	5.88235	11.7647	2.94118	100	29.4118	2.94118	29.4118	29.4118	8.82353	100	29.4118	5.88235	17.6471	35.2941	11.7647	100	0	0	97.0588	0	2.94118	100	32.3529	20.5882	44.1176	2.94118	100	0	0	88.2353	0	8.82353	2.94118	100	22.1311	22.1311	22.1311	18.0328	15.5738	-72.1311	100	1.06383	27.6596
																													25												20
PERCENTAGES BY GROUP WITHIN ANSWER
	Q3.1	Q3.2	Q3.3	Q3.4	Total Q3	Q4.1	Q4.2	Q4.3	Q4.4	Total Q4	Q5.1	Q5.2	Q5.3	Q5.4	Q5.5	Total Q5	Q6.1	Q6.2	Q6.3	Q6.4	Q6.5	Total Q6	Q7.1	Q7.2	Q7.3	Q7.4	Q7.5	Total Q7	Q8.1	Q8.2	Q8.3	Q8.4	Total Q8	Q9.1	Q9.2	Q9.3	Q9.4	Q9.5	Q9.6	Total Q9	Q10R.1	Q10R.2	Q10R.3	Q10R.4	Q10R.5	Q10R.6	Total Q10R	Q11R.1	Q11R.2
Practicing Clinicians (Therapist, Doctor, etc.) Total present: 3	0	8.33333	10	0	8.82353	11.1111	0	0	0	8.82353	0	0	10	20	0	8.82353	0	0	16.6667	16.6667	0	8.82353	0	0	9.09091	0	0	8.82353	9.09091	0	13.3333	0	8.82353	0	0	10	0	0	0	8.82353	11.1111	11.1111	11.1111	13.6364	10.5263	12.5	11.4754	0	11.5385
Non-Clinicians and Non-practicing Clinicians Total present: 31	100	91.6667	90	100	91.1765	88.8889	100	100	100	91.1765	100	100	90	80	100	91.1765	100	100	83.3333	83.3333	100	91.1765	0	0	90.9091	0	100	91.1765	90.9091	100	86.6667	100	91.1765	0	0	90	0	100	100	91.1765	88.8889	88.8889	88.8889	86.3636	89.4737	87.5	88.5246	100	88.4615
TOTAL REPLIES PER ANSWER Total present: 34	100	100	100	100	100	100	100	100	100	100	100	100	100	100	100	100	100	100	100	100	100	100	0	0	100	0	100	100	100	100	100	100	100	0	0	100	0	100	100	100	100	100	100	100	100	100	100	100	100
[truncated: 195 more columns]

## Sheet: Questions-Bucharest (26.03.13)
Meeting: Bucharest
Date: 26.03.2013
Question 2.: How experienced are you with robot therapy and other technology based neuro-rehabilitation? Choose one option.
Answer 1: Not very or not at all experienced
Answer 2: Moderately experienced
Answer 3: Very experienced
Answer 4: No reply
Question 4.: How should the recommendations be used by clinicians? Choose one option.
Answer 1: Users will be expected to select SOME measures
Answer 2: Users will be expected to use ALL measures
Answer 3: Users will be expected to use a minimum defined set of measures
Answer 4: 1 and 3
Answer 5: No reply
Question 5.: How should the recommendations be used by researchers? Choose one option.
Answer 1: Users will be expected to select SOME measures
Answer 2: Users will be expected to use ALL measures
Answer 3: Users will be expected to use a minimum defined set of measures
Answer 4: 1 and 3
Answer 5: No reply
Question 6.: What is the purpose of measurement? Choose one option.
Answer 1: To design therapy (initial decisions and changes in therapy programme)
Answer 2: To measure progress
Answer 3: Both 1 and 2
Answer 4: Neither 1 or 2
Answer 5: No reply
Question 7.: Technology generated data is data from a robot, wearable and environmental sensors, wii, social networking etc. Should any technology generated data be recommended for use by clinicians and/or researchers? Choose one option.
Answer 1: Clinicians only
Answer 2: Researchers only
Answer 3: Both
Answer 4: Neither
Answer 5: Unsure
Answer 6: No reply
Question 8a - Researchers: Which, if any, of the following quality of movement measures should be recommended? You can choose none (Press 1) or vote for FOUR options, so if you think that numbers 2, 3, 6 and 7 are the most important, press 2, 3, 6 and 7.
Answer 1: None
Answer 2: Co-ordination
Answer 3: Smoothness of movement
Answer 4: Precision/Accuracy of movement
Answer 5: Response to perturbations (disturbances during movement)
Answer 6: Number of errors and successes (during the performance of a task)
Answer 7: Compensatory (abnormal) movements
Answer 8: No reply
Question 8b - Researchers: Which, if any, of the following quality of movement measures should be recommended? You can only vote for TWO out of the FOUR options given to you.
Answer 1: None
Answer 2: Co-ordination
Answer 3: Smoothness of movement
Answer 4: Precision/Accuracy of movement
Answer 5: Response to perturbations (disturbances during movement)
Answer 6: Number of errors and successes (during the performance of a task)
Answer 7: Compensatory (abnormal) movements
Answer 8: No reply
Question 8a - Clinicians: Which, if any, of the following quality of movement measures should be recommended? You can choose none (Press 1) or vote for FOUR options, so if you think that numbers 2, 3, 6 and 7 are the most important, press 2, 3, 6 and 7.
Answer 1: None
Answer 2: Co-ordination
Answer 3: Smoothness of movement
Answer 4: Precision/Accuracy of movement
Answer 5: Response to perturbations (disturbances during movement)
Answer 6: Number of errors and successes (during the performance of a task)
Answer 7: Compensatory (abnormal) movements
Answer 8: No reply
Question 8b - Clinicians: Which, if any, of the following quality of movement measures should be recommended? You can only vote for TWO out of the FOUR options given to you.
Answer 1: None
Answer 2: Co-ordination									ANSWERS NOT RECORDED
Answer 3: Smoothness of movement
Answer 4: Precision/Accuracy of movement
Answer 5: Response to perturbations (disturbances during movement)
Answer 6: Number of errors and successes (during the performance of a task)
Answer 7: Compensatory (abnormal) movements
Answer 8: No reply
Question 9 - Research: Which, if any, of the following kinematic measures should be recommended? Choose none (Press 1) or any number of other options.
Answer 1: None
Answer 2: Active ROM (single joint)
Answer 3: Extent of workspace (multiple joints)
Answer 4: Speed of movement
Answer 5: Other measures not included above
Answer 6: No reply
Question 9 - Clinical: Which, if any, of the following kinematic measures should be recommended? Choose none (Press 1) or any number of other options.
Answer 1: None
Answer 2: Active ROM (single joint)
Answer 3: Extent of workspace (multiple joints)
Answer 4: Speed of movement
Answer 5: Other measures not included above
Answer 6: No reply
Question 10a - Researchers (Round 1): Which, if any, of the following kinetic measures, should be recommended? You can choose none (Press 1) or vote for FOUR options, so if you think that numbers 2, 3, 6 and 7 are the most important, press 2, 3, 6 and 7.
Answer 1: None
Answer 2: Isometric force in a range of muscles and positions
Answer 3: Isokinetic force in a range of muscles and movements
Answer 4: Grip strength
Answer 5: Endurance
Answer 6: Muscle stiffness (resistance to passive movement)
Answer 7: Spasticity
Answer 8: No reply
Question 10b - Researchers (Round 2): Which, if any, of the following kinetic measures should be recommended? You can only vote for TWO out of the FOUR options given to you.
Answer 1: None
Answer 2: Isometric force in a range of muscles and positions										ANSWERS NOT RECORDED
Answer 3: Isokinetic force in a range of muscles and movements
Answer 4: Grip strength
Answer 5: Endurance
Answer 6: Muscle stiffness (resistance to passive movement)
Answer 7: Spasticity
Answer 8: No reply
Question 10a - Clinicians (Round 1): Which, if any, of the following kinetic measures, should be recommended? You can choose none (Press 1) or vote for FOUR options, so if you think that numbers 2, 3, 6 and 7 are the most important, press 2, 3, 6 and 7.
Answer 1: None
Answer 2: Isometric force in a range of muscles and positions
Answer 3: Isokinetic force in a range of muscles and movements
Answer 4: Grip strength
Answer 5: Endurance
Answer 6: Muscle stiffness (resistance to passive movement)
Answer 7: Spasticity
Answer 8: No reply
Question 10b - Clinicians (Round 2): Which, if any, of the following kinetic measures should be recommended? You can only vote for TWO out of the FOUR options given to you.
Answer 1: None
Answer 2: Isometric force in a range of muscles and positions										ANSWERS NOT RECORDED
Answer 3: Isokinetic force in a range of muscles and movements
Answer 4: Grip strength
Answer 5: Endurance
Answer 6: Muscle stiffness (resistance to passive movement)
Answer 7: Spasticity
Answer 8: No reply
Question 11a - Researchers (Round 1): Which, if any, of the following muscle activity measures should be recommended? You can choose none (Press 1) or vote for THREE options, so if you think that numbers 3, 4 and 5 are the most important, press 3, 4 and 5.
Answer 1: None
Answer 2: Co-contraction
Answer 3: Synergies
Answer 4: Muscle onset time
Answer 5: Inappropriate muscle activity
Answer 6: No reply
Question 11b - Researchers (Round 2): Which, if any, of the following muscle activity measures should be recommended? You can choose none (Press 1) or vote for the THREE options given to you.
Answer 1: None
Answer 2: Co-contraction										ANSWERS NOT RECORDED
Answer 3: Synergies
Answer 4: Muscle onset time
Answer 5: Inappropriate muscle activity
Answer 6: No reply
Question 11a - Clinicians (Round 1): Which, if any, of the following muscle activity measures should be recommended? You can choose none (Press 1) or vote for THREE options, so if you think that numbers 3, 4 and 5 are the most important, press 3, 4 and 5.
Answer 1: None
Answer 2: Co-contraction
Answer 3: Synergies
Answer 4: Muscle onset time
Answer 5: Inappropriate muscle activity
Answer 6: No reply
Question 11b - Clinicians (Round 2): Which, if any, of the following muscle activity measures should be recommended? You can choose none (Press 1) or vote for the THREE options given to you.
Answer 1: None
Answer 2: Co-contraction										ANSWERS NOT RECORDED
Answer 3: Synergies
Answer 4: Muscle onset time
Answer 5: Inappropriate muscle activity
Answer 6: No reply
Question 12 - Researchers: Which, if any, of the following effort during movement measures should be recommended? You can choose none (Press 1) or any number of other options.
Answer 1: None
Answer 2: Work done, energy consumed (measured in calories)
Answer 3: O2 consumption
Answer 4: Amount of assistance required to complete task
Answer 5: No reply
Question 12 - Clinicians: Which, if any, of the following effort during movement measures should be recommended? You can choose none (Press 1) or any number of other options.
Answer 1: None
Answer 2: Work done, energy consumed (measured in calories)
Answer 3: O2 consumption
Answer 4: Amount of assistance required to complete task
Answer 5: No reply
Question 13 - Researchers: Which, if any, of the following psychomotric measures should be recommended? You can choose none (Press 1) or any number of other options.
Answer 1: None
Answer 2: Attention +/- when distracted
Answer 3: Neglect
Answer 4: Engagement
Answer 5: Reaction time
Answer 6: Pain associated with movement
Answer 7: No reply
Question 13 - Clinicians: Which, if any, of the following psychomotric measures should be recommended? You can choose none (Press 1) or any number of other options.
Answer 1: None
Answer 2: Attention +/- when distracted
Answer 3: Neglect
Answer 4: Engagement
Answer 5: Reaction time
Answer 6: Pain associated with movement
Answer 7: No reply
Question 14 - Researchers: Thinking about non-technology based measures of Impairment: Should measures be restricted to validated outcome measures such as the Fugl Meyer (FM) or Grip or muscle strength ? Choose one option.
Answer 1: Yes
Answer 2: No
Answer 3: Unsure
Answer 4: No reply
Question 14 - Clinicians: Thinking about non-technology based measures of Impairment: Should measures be restricted to validated outcome measures such as the Fugl Meyer (FM) or Grip or muscle strength ? Choose one option on your handset.
Answer 1: Yes
Answer 2: No
Answer 3: Unsure
Answer 4: No reply
Question 15 - Researchers: Which categories of technology based measures of Activity should be included in the recommendations? You can choose none (press 1) or vote for any number of other options.
Answer 1: None
Answer 2: Measures that can be used at home
Answer 3: Body-worn sensors to monitor activity
Answer 4: Body-worn sensors as surrogate measures of validated outcome measures (e.g. the WMFT)
Answer 5: Other
Answer 6: No reply
Question 15 - Clinicians: Which categories of technology based measures of Activity should be included in the recommendations? You can choose none (press 1) or vote for any number of other options.
Answer 1: None
Answer 2: Measures that can be used at home
Answer 3: Body-worn sensors to monitor activity
Answer 4: Body-worn sensors as surrogate measures of validated outcome measures (e.g. the WMFT)
Answer 5: Other
Answer 6: No reply
Question 16 - Researchers: Thinking about non-technology based measures of Activity - Should measures be restricted to validated outcome measures such as the ARAT or WMFT ? Choose one option.
Answer 1: Yes
Answer 2: No
Answer 3: Unsure
Answer 4: No reply
Question 16 - Clinicians: Thinking about non-technology based measures of Activity - Should measures be restricted to validated outcome measures such as the ARAT or WMFT ? Choose one option.
Answer 1: Yes
Answer 2: No
Answer 3: Unsure
Answer 4: No reply
Question 17 - Researchers: Thinking about non technology based measures of Participation - Should measures be restricted to validated outcome measures such as SIS, SF36 ? Choose one option.
Answer 1: Yes
Answer 2: No
Answer 3: Unsure
Answer 4: No reply
Question 17 - Clinicians: Thinking about non technology based measures of Participation - Should measures be restricted to validated outcome measures such as SIS, SF36 ? Choose one option.
Answer 1: Yes
Answer 2: No
Answer 3: Unsure
Answer 4: No reply
Question 18 - Researchers: Which categories of technology based measures of participation should be included in the recommendations? You can choose none or vote for any number of other options.
Answer 1: None
Answer 2: General self monitoring measures (quantified self) - e.g. movement tracking cameras, sensorised environment, body worn sensors, GPS.
Answer 3: Social participation e.g. social networking
Answer 4: Web based tools for completion of validated measures (e.g. SF36)
Answer 5: A measure that combines some or all of the above
Answer 6: No reply
Question 18 - Clinicians: Which categories of technology based measures of participation should be included in the recommendations? You can choose none or vote for any number of other options.
Answer 1: None
Answer 2: General self monitoring measures (quantified self) - e.g. movement tracking cameras, sensorised environment, body worn sensors, GPS.
Answer 3: Social participation e.g. social networking
Answer 4: Web based tools for completion of validated measures (e.g. SF36)
Answer 5: A measure that combines some or all of the above
Answer 6: No reply
Question 19 - Researchers: Which, if any, Neurophysiology measures should be included in the recommendations?
Answer 1: None
Answer 2: EEG
Answer 3: TMS/MEP
Answer 4: Functional neuro-imaging
Answer 5: No reply
Question 19 - Clinicians: Which, if any, Neurophysiology measures should be included in the recommendations?
Answer 1: None
Answer 2: EEG
Answer 3: TMS/MEP
Answer 4: Functional neuro-imaging
Answer 5: No reply
Question 20 - Researchers: How long would you be willing to spend on using outcome measures for assessment (beginning and end of seeing patient)? Choose one option.
Answer 1: 10 minutes
Answer 2: 15 minutes
Answer 3: 20 minutes
Answer 4: 25 minutes
Answer 5: 30 minutes
Answer 6: More than 30 minutes
Answer 7: No reply
Question 20 - Clinicians: How long would you be willing to spend on using outcome measures for assessment (beginning and end of seeing patient)? Choose one option.
Answer 1: 10 minutes
Answer 2: 15 minutes
Answer 3: 20 minutes
Answer 4: 25 minutes
Answer 5: 30 minutes
Answer 6: More than 30 minutes
Answer 7: No reply
Question 21 - Researchers: How frequently would you be willing to evaluate patient progress? Choose one option.
Answer 1: Never
Answer 2: Once a month
Answer 3: Once a week
Answer 4: Every other session
Answer 5: Every session
Answer 6: No reply
Question 21 - Clinicians: How frequently would you be willing to evaluate patient progress? Choose one option.
Answer 1: Never
Answer 2: Once a month
Answer 3: Once a week
Answer 4: Every other session
Answer 5: Every session
Answer 6: No reply
Question 22 - Researchers: How long would you be willing to spend on using outcome measures for evaluation of patient progress? Choose one option.
Answer 1: 10 minutes
Answer 2: 15 minutes
Answer 3: 20 minutes
Answer 4: 25 minutes
Answer 5: 30 minutes
Answer 6: More than 30 minutes
Answer 7: No reply
Question 22 - Clinicians: How long would you be willing to spend on using outcome measures for evaluation of patient progress? Choose one option.
Answer 1: 10 minutes
Answer 2: 15 minutes
Answer 3: 20 minutes
Answer 4: 25 minutes
Answer 5: 30 minutes
Answer 6: More than 30 minutes
Answer 7: No reply

## Sheet: Data-Bucharest (26.03.13)
COUNT
	Q2.1	Q2.2	Q2.3	Q2.4	Total Q2	Q4.1	Q4.2	Q4.3	Q4.4	Q4.5	Total Q4	Q5.1	Q5.2	Q5.3	Q5.4	Q5.5	Total Q5	Q6.1	Q6.2	Q6.3	Q6.4	Q6.5	Total Q6	Q7.1	Q7.2	Q7.3	Q7.4	Q7.5	Q7.6	Total Q7	Q8aR.1	Q8aR.2	Q8aR.3	Q8aR.4	Q8aR.5	Q8aR.6	Q8aR.7	Q8aR.8	Total Q8aR	Q8bR.1	Q8bR.2	Q8bR.3	Q8bR.4	Q8.bR5	Q8bR.6	Q8bR.7	Q8bR.8	Total Q8bR	Q8aC.1
Practicing Clinicians (Therapist, Doctor, etc.) Total present: 26	21	4	1	0	26	1	0	2	22	0	25	1	8	3	13	1	26	2	1	21	0	2	26	0	2	21	0	2	1	26	0	19	11	17	6	9	14	-50	76	0	20	9	16	10	12	13	-54	80	0
Non-Clinicians and Non-practicing Clinicians Total present: 9	2	3	3	1	9	0	1	2	5	0	8	0	2	1	4	2	9	0	0	9	0	0	9	0	0	8	0	1	0	9	0	8	5	5	7	4	7	-27	36	0	7	3	5	6	5	6	-23	32	0
TOTAL REPLIES PER ANSWER Total present: 35	23	7	4	1	35	1	1	4	27	0	33	1	10	4	17	3	35	2	1	30	0	2	35	0	2	29	0	3	1	35	0	27	16	22	13	13	21	-77	112	0	27	12	21	16	17	19	-77	112	0
PERCENTAGES BY ANSWER WITHIN GROUP
	Q2.1	Q2.2	Q2.3	Q2.4	Total Q2	Q4.1	Q4.2	Q4.3	Q4.4	Q4.5	Total Q4	Q5.1	Q5.2	Q5.3	Q5.4	Q5.5	Total Q5	Q6.1	Q6.2	Q6.3	Q6.4	Q6.5	Total Q6	Q7.1	Q7.2	Q7.3	Q7.4	Q7.5	Q7.6	Total Q7	Q8aR.1	Q8aR.2	Q8aR.3	Q8aR.4	Q8aR.5	Q8aR.6	Q8aR.7	Q8aR.8	Total Q8aR	Q8bR.1	Q8bR.2	Q8bR.3	Q8bR.4	Q8.bR5	Q8bR.6	Q8bR.7	Q8bR.8	Total Q8bR	Q8aC.1
Practicing Clinicians (Therapist, Doctor, etc.) Total present: 26	80.7692	15.3846	3.84615	0	100	4	0	8	88	0	100	3.84615	30.7692	11.5385	50	3.84615	100	7.69231	3.84615	80.7692	0	7.69231	100	0	7.69231	80.7692	0	7.69231	3.84615	100	0	25	14.4737	22.3684	7.89474	11.8421	18.4211	-65.7895	100	0	25	11.25	20	12.5	15	16.25	-67.5	100	0
Non-Clinicians and Non-practicing Clinicians Total present: 9	22.2222	33.3333	33.3333	11.1111	100	0	12.5	25	62.5	0	100	0	22.2222	11.1111	44.4444	22.2222	100	0	0	100	0	0	100	0	0	88.8889	0	11.1111	0	100	0	22.2222	13.8889	13.8889	19.4444	11.1111	19.4444	-75	100	0	21.875	9.375	15.625	18.75	15.625	18.75	-71.875	100	0
TOTAL REPLIES PER ANSWER Total present: 35	65.7143	20	11.4286	2.85714	100	3.0303	3.0303	12.1212	81.8182	0	100	2.85714	28.5714	11.4286	48.5714	8.57143	100	5.71429	2.85714	85.7143	0	5.71429	100	0	5.71429	82.8571	0	8.57143	2.85714	100	0	24.1071	14.2857	19.6429	11.6071	11.6071	18.75	-68.75	100	0	24.1071	10.7143	18.75	14.2857	15.1786	16.9643	-68.75	100	0
PERCENTAGES BY GROUP WITHIN ANSWER
	Q2.1	Q2.2	Q2.3	Q2.4	Total Q2	Q4.1	Q4.2	Q4.3	Q4.4	Q4.5	Total Q4	Q5.1	Q5.2	Q5.3	Q5.4	Q5.5	Total Q5	Q6.1	Q6.2	Q6.3	Q6.4	Q6.5	Total Q6	Q7.1	Q7.2	Q7.3	Q7.4	Q7.5	Q7.6	Total Q7	Q8aR.1	Q8aR.2	Q8aR.3	Q8aR.4	Q8aR.5	Q8aR.6	Q8aR.7	Q8aR.8	Total Q8aR	Q8bR.1	Q8bR.2	Q8bR.3	Q8bR.4	Q8.bR5	Q8bR.6	Q8bR.7	Q8bR.8	Total Q8bR	Q8aC.1
Practicing Clinicians (Therapist, Doctor, etc.) Total present: 26	91.3043	57.1429	25	0	74.2857	100	0	50	81.4815	#DIV/0!	75.7576	100	80	75	76.4706	33.3333	74.2857	100	100	70	0	100	74.2857	0	100	72.4138	0	66.6667	100	74.2857	0	70.3704	68.75	77.2727	46.1538	69.2308	66.6667	64.9351	67.8571	0	74.0741	75	76.1905	62.5	70.5882	68.4211	70.1299	71.4286	0
Non-Clinicians and Non-practicing Clinicians Total present: 9	8.69565	42.8571	75	100	25.7143	0	100	50	18.5185	#DIV/0!	24.2424	0	20	25	23.5294	66.6667	25.7143	0	0	30	0	0	25.7143	0	0	27.5862	0	33.3333	0	25.7143	0	29.6296	31.25	22.7273	53.8462	30.7692	33.3333	35.0649	32.1429	0	25.9259	25	23.8095	37.5	29.4118	31.5789	29.8701	28.5714	0
TOTAL REPLIES PER ANSWER Total present: 35	100	100	100	100	100	100	100	100	100	#DIV/0!	100	100	100	100	100	100	100	100	100	100	0	100	100	0	100	100	0	100	100	100	0	100	100	100	100	100	100	100	100	0	100	100	100	100	100	100	100	100	0
[truncated: 239 more columns]

## Sheet: Questions-Enschede (08.04.13)
Meeting: Enschede
Date: 08.04.2013
Question 3.: How experienced are you with robot therapy and other technology based neuro-rehabilitation? Choose one option.
Answer 1: Not very or not at all experienced
Answer 2: Moderately experienced
Answer 3: Very experienced
Answer 4: No reply
Question 4a1.: How should the recommendations be used by clinicians? Choose one option.
Answer 1: Users will be expected to select SOME measures
Answer 2: Users will be expected to use ALL measures
Answer 3: Users will be expected to use a minimum defined set of measures and select other measures as appropriate
Answer 4: No reply
Question 4a2.: How should the recommendations be used by researchers? Choose one option.
Answer 1: Users will be expected to select SOME measures
Answer 2: Users will be expected to use ALL measures
Answer 3: Users will be expected to use a minimum defined set of measures and select other measures as appropriate
Answer 4: No reply
Question 4b.: Should we include a section in which we recommend measures that are not currently widely used or practical, but which we consider have the potential to be useful? Choose ONE or any number of options from 2-3.
Answer 1: No
Answer 2: Yes
Answer 3: I’d like to discuss this question
Answer 4: No reply
Question 5 - Research: Which, if any, of the following quality of movement measures should be recommended? You can choose none (press 1), or all (press 2) or vote for up to TWO options out of 3, 4 and 5.
Answer 1: None										QUESTION ASKED AND ANSWERED 2 TIMES
Answer 2: All of the 3-5 below
Answer 3: Performance quality (Co-ordination, smoothness of movement, precision/accuracy of movement, number of errors and successes - during the performance of a task)
Answer 4: Response to perturbations (disturbances during movement)
Answer 5: Compensatory (abnormal) movements
Answer 6: No reply
Question 5 - Clinical: Which, if any, of the following quality of movement measures should be recommended? You can choose none (press 1), or all (press 2) or vote for up to TWO options out of 3, 4 and 5.
Answer 1: None										QUESTION ASKED AND ANSWERED 3 TIMES
Answer 2: All of the 3-5 below
Answer 3: Performance quality (Co-ordination, smoothness of movement, precision/accuracy of movement, number of errors and successes - during the performance of a task)
Answer 4: Response to perturbations (disturbances during movement)
Answer 5: Compensatory (abnormal) movements
Answer 6: No reply
Question 6 - Research: Which, if any, of the following kinematic measures should be recommended? Choose one of the following.
Answer 1: None
Answer 2: At least one kinematic measure
Answer 3: A range of measures e.g active ROM (single joint), extent of workspace (multiple joints), speed of movement
Answer 4: No reply
Question 6 - Clinical: Which, if any, of the following kinematic measures should be recommended? Choose one of the following.
Answer 1: None
Answer 2: At least one kinematic measure
Answer 3: A range of measures e.g active ROM (single joint), extent of workspace (multiple joints), speed of movement
Answer 4: No reply
Question 7 - Research: Which, if any, of the following kinetic measures, should be recommended? You can choose none (press 1), or all (press 2) or vote for up to FOUR options out of 3-7.
Answer 1: None
Answer 2: A range of measures relevant to the patient’s problems, appropriate to or recorded by the technology (e.g. 3-7)
Answer 3: Isometric force in a range of muscles and positions
Answer 4: Isokinetic force in a range of muscles and movements, endurance
Answer 5: Grip strength
Answer 6: Non-neural muscle stiffness (resistance to passive movement)
Answer 7: Spasticity
Answer 8: No reply
Question 7 - Clinical: Which, if any, of the following kinetic measures, should be recommended? You can choose none (press 1), or all (press 2) or vote for up to FOUR options out of 3-7.
Answer 1: None
Answer 2: A range of measures relevant to the patient’s problems, appropriate to or recorded by the technology (e.g. 3-7)
Answer 3: Isometric force in a range of muscles and positions
Answer 4: Isokinetic force in a range of muscles and movements, endurance
Answer 5: Grip strength
Answer 6: Non-neural muscle stiffness (resistance to passive movement)
Answer 7: Spasticity
Answer 8: No reply
Question 8 - Research: Which, if any, of the following muscle activity measures (EMG) should be recommended? You can choose none (press 1) or all (press 2) or vote for up to THREE options out of 3, 4, 5 and 6.
Answer 1: None
Answer 2: A range of EMG measures relevant to the patient’s problems, appropriate to or recorded by the technology-based intervention (e.g. 3-6)
Answer 3: Co-contraction
Answer 4: Synergies
Answer 5: Muscle onset time
Answer 6: Inappropriate muscle activity
Answer 7: No reply
Question 8 - Clinical: Which, if any, of the following muscle activity measures (EMG) should be recommended? You can choose none (press 1) or all (press 2) or vote for up to THREE options out of 3, 4, 5 and 6.
Answer 1: None										QUESTION ASKED AND ANSWERED 2 TIMES
Answer 2: A range of EMG measures relevant to the patient’s problems, appropriate to or recorded by the technology-based intervention (e.g. 3-6)
Answer 3: Co-contraction
Answer 4: Synergies
Answer 5: Muscle onset time
Answer 6: Inappropriate muscle activity
Answer 7: No reply
Question 9 - Research: Which, if any, of the following effort during movement measures should be recommended? You can choose none (Press 1) or all (press 2) or up to TWO options from 3,4 and 5.
Answer 1: None
Answer 2: A range of measures relevant to the patient’s problems, appropriate to or recorded by the technology-based intervention (e.g. 3-5)
Answer 3: Work done, energy consumed (measured in calories)
Answer 4: O2 consumption
Answer 5: Amount of assistance required to complete task
Answer 6: No reply
Question 9 - Clinical: Which, if any, of the following effort during movement measures should be recommended? You can choose none (Press 1) or all (press 2) or up to TWO options from 3,4 and 5.
Answer 1: None										QUESTION ASKED AND ANSWERED 4 TIMES
Answer 2: A range of measures relevant to the patient’s problems, appropriate to or recorded by the technology-based intervention (e.g. 3-5)
Answer 3: Work done, energy consumed (measured in calories)
Answer 4: O2 consumption
Answer 5: Amount of assistance required to complete task
Answer 6: No reply
Question 10 - Research: Which, if any, of the following psychomotric measures should be recommended? You can choose none (Press 1) or all (press 2) or up to FOUR options from 3-7.
Answer 1: None										QUESTION ASKED AND ANSWERED 2 TIMES
Answer 2: A range of Psychomotric measures relevant to the patient’s problems, appropriate to or recorded by the technology-based intervention (e.g. 3-7)
Answer 3: Attention +/- when distracted
Answer 4: Neglect
Answer 5: Engagement
Answer 6: Reaction time
Answer 7: Pain associated with movement
Answer 8: No reply
Question 10 - Clinical: Which, if any, of the following psychomotric measures should be recommended? You can choose none (Press 1) or all (press 2) or up to FOUR options from 3-7.
Answer 1: None
Answer 2: A range of Psychomotric measures relevant to the patient’s problems, appropriate to or recorded by the technology-based intervention (e.g. 3-7)
Answer 3: Attention +/- when distracted
Answer 4: Neglect
Answer 5: Engagement
Answer 6: Reaction time
Answer 7: Pain associated with movement
Answer 8: No reply
Question 11 - Research: Thinking about non-technology based measures of Impairment, should measures be restricted to validated outcome measures such as the Fugl Meyer (FM) or Grip or muscle strength ? Choose one option.
Answer 1: Yes										QUESTION ASKED AND ANSWERED 2 TIMES
Answer 2: Yes, except in certain circumstances (e.g. experimental research, development of new technologies or for the purposes of validation)
Answer 3: No
Answer 4: Unsure
Answer 5: No reply
Question 11 - Clinical: Thinking about non-technology based measures of Impairment, should measures be restricted to validated outcome measures such as the Fugl Meyer (FM) or Grip or muscle strength ? Choose one option.
Answer 1: Yes
Answer 2: No
Answer 3: Unsure
Answer 4: No reply
Question 12.: Which of the following Impairment Measures should be recommended? Choose any number of options.
Answer 1: Fugl Myer
Answer 2: Oxford Muscle grading
Answer 3: Ashworth
Answer 4: Tardieu
Answer 5: I would like to suggest some others
Answer 6: No reply
Question 13 - Research: Which categories of technology based measures of Activity should be included in the recommendations? You can choose none (press 1), all (press 2) or vote for TWO options from 3-5.
Answer 1: None
Answer 2: A range of measures relevant to the patient’s problems, appropriate to or recorded by the technology-based intervention (e.g. 3-5)
Answer 3: Measures that can be used at home
Answer 4: Body-worn sensors to monitor activity
Answer 5: Body-worn sensors as surrogate measures of function (e.g. the WMFT)
Answer 6: No reply
Question 13 - Clinical: Which categories of technology based measures of Activity should be included in the recommendations? You can choose none (press 1), all (press 2) or vote for TWO options from 3-5.
Answer 1: None
Answer 2: A range of measures relevant to the patient’s problems, appropriate to or recorded by the technology-based intervention (e.g. 3-5)
Answer 3: Measures that can be used at home
Answer 4: Body-worn sensors to monitor activity
Answer 5: Body-worn sensors as surrogate measures of function (e.g. the WMFT)
Answer 6: No reply
Question 14 - Research: Thinking about non-technology based measures of Activity, should measures be restricted to validated outcome measures such as the Action Research Arm Test (ARAT) or Wolf Motor Function Test (WMFT)? Choose one option.
Answer 1: Yes
Answer 2: Yes, except in certain circumstances (e.g. experimental research, development of new technologies or for the purposes of validation)
Answer 3: No
Answer 4: Unsure
Answer 5: No reply
Question 14 - Clinical: Thinking about non-technology based measures of Activity, should measures be restricted to validated outcome measures such as the Action Research Arm Test (ARAT) or Wolf Motor Function Test (WMFT)? Choose one option.
Answer 1: Yes
Answer 2: No
Answer 3: Unsure
Answer 4: No reply
Question 15.: Which of the following Activity Measures should be recommended? Choose any number of options.
Answer 1: WMFT
Answer 2: Modified WMFT
Answer 3: Motricity Index
Answer 4: ARAT
Answer 5: Box and Block
Answer 6: I would like to suggest some others
Answer 7: No reply
Question 16 - Research: Thinking about non-technology based Measures of Participation, should measures be restricted to validated outcome measures such as the Stroke Impact Scale (SIS), Short Form-36 (SF36)? Choose one option.
Answer 1: Yes
Answer 2: Yes, except in certain circumstances (e.g. experimental research, development of new technologies or for the purposes of validation)
Answer 3: No
Answer 4: Unsure
Answer 5: No reply
Question 16 - Clinical: Thinking about non-technology based Measures of Participation, should measures be restricted to validated outcome measures such as the Stroke Impact Scale (SIS), Short Form-36 (SF36)? Choose one option.
Answer 1: Yes
Answer 2: No
Answer 3: Unsure
Answer 4: No reply
Question 17.: Which of the following Participation Measures should be recommended? Choose any number of options.
Answer 1: SF-36
Answer 2: Stroke Impact Scale
Answer 3: NeuoQoL
Answer 4: I would like to suggest some others
Answer 5: No reply
Question 18 - Research: Which categories of technology based Measures of Participation should be included in the recommendations? You can choose none (press 1), all (press 2) or vote for TWO options from 3-5.
Answer 1: None
Answer 2: All of the 3-5 below
Answer 3: General self monitoring measures (quantified self) - e.g. movement tracking cameras, sensorised environment, body worn sensors, GPS
Answer 4: Social participation (e.g. social networking)
Answer 5: Web based tools for completion of validated measures (e.g. SF36)
Answer 6: No reply
Question 18 - Clinical: Which categories of technology based Measures of Participation should be included in the recommendations? You can choose none (press 1), all (press 2) or vote for TWO options from 3-5.
Answer 1: None
Answer 2: All of the 3-5 below
Answer 3: General self monitoring measures (quantified self) - e.g. movement tracking cameras, sensorised environment, body worn sensors, GPS
Answer 4: Social participation (e.g. social networking)
Answer 5: Web based tools for completion of validated measures (e.g. SF36)
Answer 6: No reply
Question 19 - Research: Which, if any, Neurophysiology measures should be recommended? You can choose none (press 1) or all (press 2) or vote for TWO options from 3-5.
Answer 1: None
Answer 2: A range of Neurophysiology Measures relevant to the patient’s problems, appropriate to or recorded by the technology-based intervention (e.g. 3-5)
Answer 3: EEG
Answer 4: TMS/MEP
Answer 5: Functional neuro-imaging
Answer 6: No reply
Question 19 - Clinical: Which, if any, Neurophysiology measures should be recommended? You can choose none (press 1) or all (press 2) or vote for TWO options from 3-5.
Answer 1: None
Answer 2: A range of Neurophysiology Measures relevant to the patient’s problems, appropriate to or recorded by the technology-based intervention (e.g. 3-5)
Answer 3: EEG
Answer 4: TMS/MEP
Answer 5: Functional neuro-imaging
Answer 6: No reply
Question 20.: Should self-reported measures such as the Motor Activity Log (MAL) be recommended? Choose ONE or any number of options from 2-4.
Answer 1: No										QUESTION ASKED AND ANSWERED 2 TIMES
Answer 2: Yes
Answer 3: I’d like to discuss this question
Answer 4: I’d like to suggest some measures
Answer 5: No reply
Question 21.: Which of the following Self-reported Measures should be recommended? Choose any number of options.
Answer 1: Abilhand
Answer 2: Motor Activity Log
Answer 3: I would like to suggest some others
Answer 4: No reply

## Sheet: Data-Enschede (08.04.13)
COUNT
	Q3.1	Q3.2	Q3.3	Q3.4	Total Q3	Q4a1.1	Q4a1.2	Q4a1.3	Q4a1.4	Total Q.4a1	Q4a2.1	Q4a2.2	Q4a2.3	Q4a2.4	Total Q.4a2	Q4b.1	Q4b.2	Q4b.3	Q4b.4	Total Q4b	Q5R2.1	Q5R2.2	Q5R2.3	Q5R2.4	Q5R2.5	Q5R2.6	Total Q5R2	Q5C3.1	Q5C3.2	Q5C3.3	Q5C3.4	Q5C3.5	Q5C3.6	Total Q5C3	Q6R.1	Q6R.2	Q6R.3	Q6R.4	Total Q6R	Q6C.1	Q6C.2	Q6C.3	Q6C.4	Total Q6C	Q7R.1	Q7R.2	Q7R.3	Q7R.4	Q7R.5
Practicing Clinicians (Therapist, Doctor, etc.) Total present: 12	5	5	2	0	12	0	0	12	0	12	0	0	12	0	12	0	11	1	0	12	0	7	2	0	2	1	11	0	7	1	0	0	4	8	0	1	9	2	12	0	1	9	2	12	0	10	0	1	1
Non-Clinicians and Non-practicing Clinicians Total present: 59	16	30	13	0	59	10	1	47	1	59	5	2	50	2	59	2	54	1	2	59	0	48	9	1	6	-5	64	0	37	12	0	6	4	55	1	5	50	3	59	1	9	45	4	59	2	46	8	6	10
TOTAL REPLIES PER ANSWER Total present: 71	21	35	15	0	71	10	1	59	1	71	5	2	62	2	71	2	65	2	2	71	0	55	11	1	8	-4	75	0	44	13	0	6	8	63	1	6	59	5	71	1	10	54	6	71	2	56	8	7	11
PERCENTAGES BY ANSWER WITHIN GROUP
	Q3.1	Q3.2	Q3.3	Q3.4	Total Q3	Q4a1.1	Q4a1.2	Q4a1.3	Q4a1.4	Total Q.4a1	Q4a2.1	Q4a2.2	Q4a2.3	Q4a2.4	Total Q.4a2	Q4b.1	Q4b.2	Q4b.3	Q4b.4	Total Q4b	Q5R2.1	Q5R2.2	Q5R2.3	Q5R2.4	Q5R2.5	Q5R2.6	Total Q5R2	Q5C3.1	Q5C3.2	Q5C3.3	Q5C3.4	Q5C3.5	Q5C3.6	Total Q5C3	Q6R.1	Q6R.2	Q6R.3	Q6R.4	Total Q6R	Q6C.1	Q6C.2	Q6C.3	Q6C.4	Total Q6C	Q7R.1	Q7R.2	Q7R.3	Q7R.4	Q7R.5
Practicing Clinicians (Therapist, Doctor, etc.) Total present: 12	41.6667	41.6667	16.6667	0	100	0	0	100	0	100	0	0	100	0	100	0	91.6667	8.33333	0	100	0	63.6364	18.1818	0	18.1818	9.09091	100	0	87.5	12.5	0	0	50	100	0	8.33333	75	16.6667	100	0	8.33333	75	16.6667	100	0	76.9231	0	7.69231	7.69231
Non-Clinicians and Non-practicing Clinicians Total present: 59	27.1186	50.8475	22.0339	0	100	16.9492	1.69492	79.661	1.69492	100	8.47458	3.38983	84.7458	3.38983	100	3.38983	91.5254	1.69492	3.38983	100	0	75	14.0625	1.5625	9.375	-7.8125	100	0	67.2727	21.8182	0	10.9091	7.27273	100	1.69492	8.47458	84.7458	5.08475	100	1.69492	15.2542	76.2712	6.77966	100	2.27273	52.2727	9.09091	6.81818	11.3636
TOTAL REPLIES PER ANSWER Total present: 71	29.5775	49.2958	21.1268	0	100	14.0845	1.40845	83.0986	1.40845	100	7.04225	2.8169	87.3239	2.8169	100	2.8169	91.5493	2.8169	2.8169	100	0	73.3333	14.6667	1.33333	10.6667	-5.33333	100	0	69.8413	20.6349	0	9.52381	12.6984	100	1.40845	8.4507	83.0986	7.04225	100	1.40845	14.0845	76.0563	8.4507	100	1.9802	55.4455	7.92079	6.93069	10.8911
																												20
PERCENTAGES BY GROUP WITHIN ANSWER
	Q3.1	Q3.2	Q3.3	Q3.4	Total Q3	Q4a1.1	Q4a1.2	Q4a1.3	Q4a1.4	Total Q.4a1	Q4a2.1	Q4a2.2	Q4a2.3	Q4a2.4	Total Q.4a2	Q4b.1	Q4b.2	Q4b.3	Q4b.4	Total Q4b	Q5R2.1	Q5R2.2	Q5R2.3	Q5R2.4	Q5R2.5	Q5R2.6	Total Q5R2	Q5C3.1	Q5C3.2	Q5C3.3	Q5C3.4	Q5C3.5	Q5C3.6	Total Q5C3	Q6R.1	Q6R.2	Q6R.3	Q6R.4	Total Q6R	Q6C.1	Q6C.2	Q6C.3	Q6C.4	Total Q6C	Q7R.1	Q7R.2	Q7R.3	Q7R.4	Q7R.5
Practicing Clinicians (Therapist, Doctor, etc.) Total present: 12	23.8095	14.2857	13.3333	0	16.9014	0	0	20.339	0	16.9014	0	0	19.3548	0	16.9014	0	16.9231	50	0	16.9014	0	12.7273	18.1818	0	25	-25	14.6667	0	15.9091	7.69231	0	0	50	12.6984	0	16.6667	15.2542	40	16.9014	0	10	16.6667	33.3333	16.9014	0	17.8571	0	14.2857	9.09091
Non-Clinicians and Non-practicing Clinicians Total present: 59	76.1905	85.7143	86.6667	0	83.0986	100	100	79.661	100	83.0986	100	100	80.6452	100	83.0986	100	83.0769	50	100	83.0986	0	87.2727	81.8182	100	75	125	85.3333	0	84.0909	92.3077	0	100	50	87.3016	100	83.3333	84.7458	60	83.0986	100	90	83.3333	66.6667	83.0986	100	82.1429	100	85.7143	90.9091
TOTAL REPLIES PER ANSWER Total present: 71	100	100	100	0	100	100	100	100	100	100	100	100	100	100	100	100	100	100	100	100	0	100	100	100	100	100	100	0	100	100	0	100	100	100	100	100	100	100	100	100	100	100	100	100	100	100	100	100	100
[truncated: 183 more columns]

[truncated: 4 more sheets: Questions-Pisa (10.05.13), Data-Pisa (10.05.13), Questions-San Sebast (05.06.13), Data-San Sebastian (05.06.13)]
